# Supplementary material
Source: PubMed Central journal article supplement (PMC3476789)
Supplement: ijbmb0003-0250-f4.pdf [file ijbmb0003-0250-f4.pdf]

## Cys-scanning insights to the NAT/NCS2 family

### Supplemental Data

**Table S1.** Protein sequences used to construct phylogeny of the NAT/NCS2 family

| Organism                             | Transporter<br>(mnemonic) | Family<br>(NCBI) | Accession number |
|--------------------------------------|---------------------------|------------------|------------------|
| <b>BACTERIA</b>                      |                           |                  |                  |
| <i>Escherichia coli</i>              |                           |                  |                  |
|                                      | XanQ (YgfO)               | NAT/NCS2         | P67444           |
|                                      | XanP (YicE)               | NAT/NCS2         | POAGM9           |
|                                      | UraA                      | NAT/NCS2         | POAGM7           |
|                                      | UacT (YgfU)               | NAT/NCS2         | Q46821           |
|                                      | RutG (YcdG)               | NAT/NCS2         | AAC74091         |
|                                      | YbbY                      | NAT/NCS2         | P77328           |
|                                      | PurP (YieG)               | AzgA-like        | P31466           |
|                                      | YicO                      | AzgA-like        | P31440           |
|                                      | YgfQ                      | AzgA-like        | Q46817           |
|                                      | YjcD                      | AzgA-like        | POAF52           |
| <i>Bacillus subtilis</i>             |                           |                  |                  |
|                                      | PbuX                      | NAT/NCS2         | P42086           |
|                                      | PucJ                      | NAT/NCS2         | O32139           |
|                                      | PucK                      | NAT/NCS2         | O32140           |
|                                      | PyrP                      | NAT/NCS2         | YP_003865951     |
|                                      | PbuO                      | AzgA-like        | O34978           |
|                                      | PbuG                      | AzgA-like        | O34987           |
| <i>Sinorhizobium meliloti</i>        |                           |                  |                  |
|                                      | SMc02513                  | NAT/NCS2         | CAC47601         |
|                                      | SMc02512                  | NAT/NCS2         | CAC47602         |
|                                      | SMb20289                  | NAT/NCS2         | CAC48679         |
|                                      | SMb20134                  | NAT/NCS2         | CAC48534         |
|                                      | SMb21281                  | AzgA-like        | NP_437325.1      |
| <b>ARCHAEA</b>                       |                           |                  |                  |
| <i>Pyrococcus abyssi</i>             |                           |                  |                  |
|                                      | P.abyssei NAT             | NAT/NCS2         | NP_126472.1      |
|                                      | P.abyssei HGAT            | AzgA-like        | NP_126753.1      |
| <i>Haloferax volcanii</i>            |                           |                  |                  |
|                                      | H.volcanii NAT1           | NAT/NCS2         | YP_003533379.1   |
|                                      | H.volcanii NAT2           | NAT/NCS2         | YP_003536273.1   |
| <i>Halobacterium sp.</i>             |                           |                  |                  |
|                                      | Halobacterium NAT         | NAT/NCS2         | ZP_09028835.1    |
|                                      | Halobacterium HGAT        | AzgA-like        | NP_280776.1      |
| <i>Sulfolobus acidocaldarius</i>     |                           |                  |                  |
|                                      | Sulfolobus HGAT           | AzgA-like        | YP_256300.1      |
| <i>Methanococcus maripaludis</i>     |                           |                  |                  |
|                                      | Methanococcus NAT         | NAT/NCS2         | NP_987801.1      |
| <i>Methanocaldococcus jannaschii</i> |                           |                  |                  |
|                                      | M.jannaschi HGAT          | AzgA-like        | NP_247298.1      |
| <b>PROTISTA</b>                      |                           |                  |                  |
| <i>Dictyostelium discoideum</i>      |                           |                  |                  |
|                                      | Dictyostelium NAT1        | NAT/NCS2         | XP_638319.1      |
|                                      | Dictyostelium NAT2        | NAT/NCS2         | XP_642632.1      |
| <i>Phaeodactylum tricornutum</i>     |                           |                  |                  |
|                                      | Phaeodactylum NAT1        | NAT/NCS2         | XP_002184514.1   |
|                                      | Phaeodactylum NAT2        | NAT/NCS2         | XP_002177123.1   |
|                                      | Phaeodactylum AzgA        | AzgA-like        | XP_002176623.1   |
| <i>Chlorella variabilis</i>          |                           |                  |                  |
|                                      | Chlorella NAT1            | NAT/NCS2         | EFN55989.1       |
|                                      | Chlorella NAT2            | NAT/NCS2         | EFN51042.1       |
|                                      | Chlorella AzgA1           | AzgA-like        | EFN58296.1       |
|                                      | Chlorella AzgA2           | AzgA-like        | EFN55661.1       |
|                                      | Chlorella AzgA3           | AzgA-like        | EFN53511.1       |
|                                      | Chlorella AzgA4           | AzgA-like        | EFN58112.1       |
| <i>Micromonas sp.</i>                |                           |                  |                  |

## Cys-scanning insights to the NAT/NCS2 family

|                                  |                     |           |                |                |
|----------------------------------|---------------------|-----------|----------------|----------------|
| <i>Chlamydomonas reinhardtii</i> | Micromonas NAT      | NAT/NCS2  | XP_002507868.1 |                |
|                                  | Chlamydomonas NAT1  | NAT/NCS2  | XP_001690343.1 |                |
|                                  | Chlamydomonas NAT2  | NAT/NCS2  | XP_001702660.1 |                |
|                                  | Chlamydomonas NAT3  | NAT/NCS2  | XP_001690514.1 |                |
| <i>Ectocarpus siliculosus</i>    | Chlamydomonas AzgA  | AzgA-like | XP_001696326.1 |                |
|                                  | Ectocarpus NAT      | NAT/NCS2  | CBJ33435.1     |                |
| FUNGI                            |                     |           |                |                |
| <i>Aspergillus nidulans</i>      | UapA                | NAT/NCS2  | Q07307         |                |
|                                  | UapC                | NAT/NCS2  | P48777         |                |
|                                  | AzgA                | AzgA-like | Q7Z8R3         |                |
| <i>Aspergillus fumigatus</i>     | AfUapA              | NAT/NCS2  | XP748919       |                |
|                                  | AfAzgA              | AzgA-like | XP_753664.1    |                |
| <i>Candida albicans</i>          | Xut1                | NAT/NCS2  | AAX22221.1     |                |
| <i>Schizosaccharomyces pombe</i> | S.pombe NAT         | NAT/NCS2  | NP_593513.1    |                |
|                                  | S.pombe AzgA        | AzgA-like | NP_596491.1    |                |
| PLANTAE                          |                     |           |                |                |
| <i>Arabidopsis thaliana</i>      | AtNAT1              | NAT/NCS2  | AEC05969       |                |
|                                  | AtNAT2              | NAT/NCS2  | AEC08934       |                |
|                                  | AtNAT3              | NAT/NCS2  | AEC07849       |                |
|                                  | AtNAT4              | NAT/NCS2  | AEE32500       |                |
|                                  | AtNAT5              | NAT/NCS2  | AED95881       |                |
|                                  | AtNAT6              | NAT/NCS2  | AED97669       |                |
|                                  | AtNAT7              | NAT/NCS2  | AEE33651       |                |
|                                  | AtNAT8              | NAT/NCS2  | AEE28592       |                |
|                                  | AtNAT9              | NAT/NCS2  | AED93439       |                |
|                                  | AtNAT10             | NAT/NCS2  | AEE34395       |                |
|                                  | AtNAT11             | NAT/NCS2  | AEE86867       |                |
|                                  | AtNAT12             | NAT/NCS2  | AEC08049       |                |
|                                  | AtAzgA1             | AzgA-like | AEE74982       |                |
|                                  | AtAzgA2             | AzgA-like | AED95923       |                |
|                                  | <i>Zea mays</i>     | Lpe1      | NAT/NCS2       | NP_001150400.1 |
|                                  | <i>Oryza sativa</i> | OsNAT     | NAT/NCS2       | NP_001051745.1 |
|                                  |                     | OsAzgA    | AzgA-like      | EAY97568.1     |
| ANIMALIA                         |                     |           |                |                |
| <i>Caenorhabditis elegans</i>    | C.elegans C51E3.6   | NAT/NCS2  | CAB01641       |                |
|                                  | C.elegans T07G12.5  | NAT/NCS2  | CAB05270       |                |
|                                  | C.elegans Y59E9AL.4 | NAT/NCS2  | CCD74085       |                |
|                                  | C.elegans R11E3.2   | NAT/NCS2  | CCD72237       |                |
|                                  | C.elegans T07G12.2  | NAT/NCS2  | CAB05274       |                |
|                                  | C.elegans T07G12.4  | NAT/NCS2  | NP_501946      |                |
| <i>Drosophila melanogaster</i>   | Drosophila NAT      | NAT/NCS2  | AAF54519       |                |
| <i>Anopheles gambiae</i>         | Anopheles NAT       | NAT/NCS2  | AAM97678       |                |
| <i>Danio rerio</i>               | Zebrafish SVCT1     | NAT/NCS2  | NP_001166970.1 |                |
|                                  | Zebrafish SVCT2     | NAT/NCS2  | XP_001339365.2 |                |
| <i>Mus musculus</i>              | mSVCT1              | NAT/NCS2  | Q9Z2J0         |                |
|                                  | mSVCT2              | NAT/NCS2  | Q93PR4         |                |
|                                  | mSlc23a3 (Yspl1)    | NAT/NCS2  | Q60850.1       |                |

## Cys-scanning insights to the NAT/NCS2 family

|                          |          |          |              |
|--------------------------|----------|----------|--------------|
| <i>Rattus norvegicus</i> | rSVCT1   | NAT/NCS2 | Q9WTW7       |
|                          | rSVCT2   | NAT/NCS2 | Q9WTW8       |
|                          | rSlc23a3 | NAT/NCS2 | NP_001102476 |
|                          | rSNBT1   | NAT/NCS2 | BAI66650     |
| <i>Sus scrofa</i>        | pSVCT1   | NAT/NCS2 | XP_003124027 |
|                          | pSVCT2   | NAT/NCS2 | NP_999343    |
|                          | pSlc23a3 | NAT/NCS2 | XP_1925561   |
|                          | pSLC23A4 | NAT/NCS2 | XP_003134705 |
| <i>Homo sapiens</i>      | hSVCT1   | NAT/NCS2 | Q9UHI7       |
|                          | hSVCT2   | NAT/NCS2 | Q9UGH3       |
|                          | hSlc23a3 | NAT/NCS2 | Q6PIS1       |

---

Supplemental Data

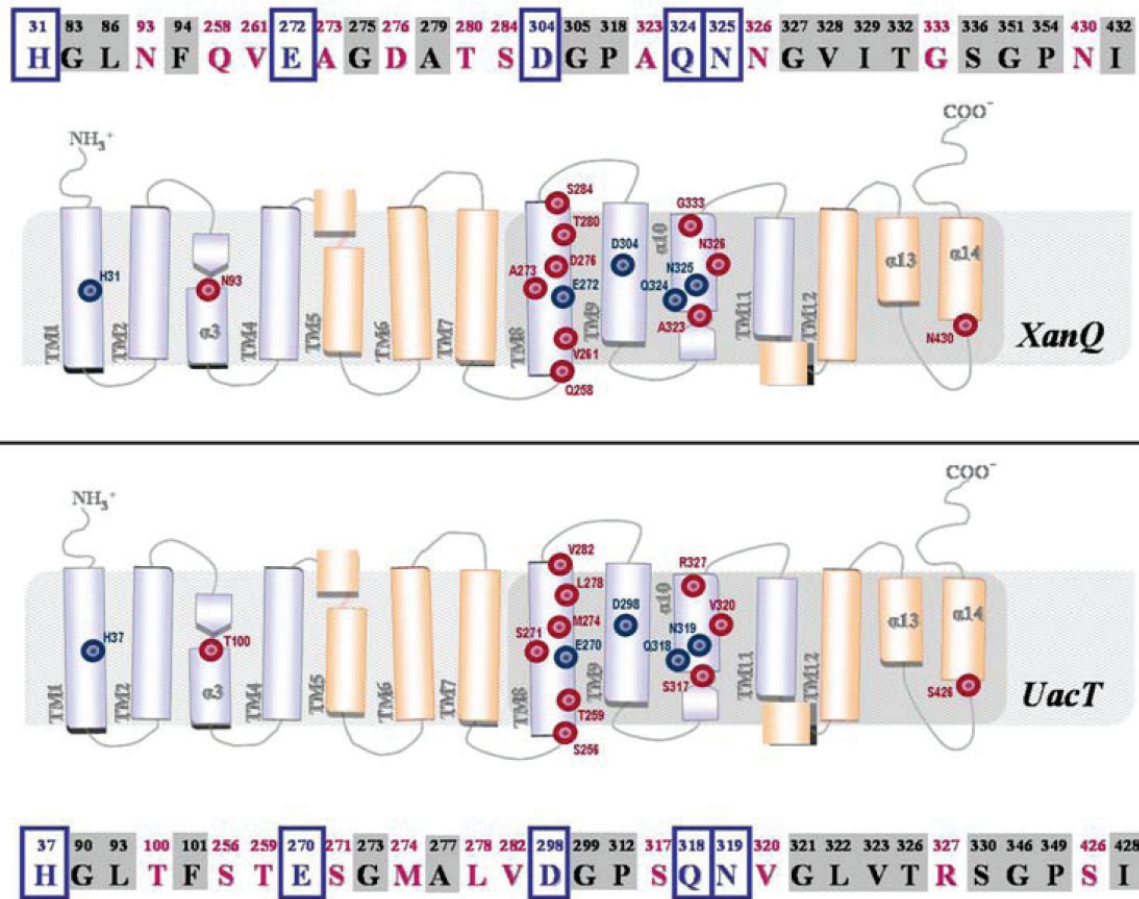

**Figure S1.** Mutagenesis targets from the set of important residues of permease XanQ. Topology models of permeases XanQ and UacT showing residues subjected to mutagenesis at invariable (*blue*) and variable positions (*red*) [26]. Selection of mutagenesis targets is based on Cys-scanning analysis of XanQ (see text). The corresponding residues of XanQ (*top*) and UacT (*bottom*) are shown in separate rows, highlighting residues subjected to mutagenesis at variable (*red*) and invariable positions (*blue*) and other invariably conserved side chains that were not studied in UacT (*black labels with grey background*). Cylinders of different colors denote transmembrane segments (TMs) of the core domain (*light blue*) and the gate domain (*light orange*). The topology models are based on homology threading on the x-ray structure of UraA [25].
